# Supplementary material
Source: HighWire-hosted journal article supplement (https://ebmtp.com/highwire/filestream/136120/field_highwire_adjunct_files/0/asakai_85_2053.pdf)
Supplement: asakai_85_2053.pdf [file asakai_85_2053.pdf]

# 心脏病患儿的动脉缺血性卒中

Hiroko Asakai, MD;Michael Cardamone, BSc(Hons), PhD, MBBS, FRACP;Darren Hutchinson, MD;

Belinda Stojanovski, BNU;John C. Galati, BSc, PhD;

Michael M.H. Cheung, MBChB, MD;Mark T. Mackay, MBBS

**目的：**为了描述心脏病患儿合并有动脉缺血性卒中(arterial ischemic stroke, AIS)的心脏疾病谱、介入治疗的时机及预后。

**方法：**采用 ICD-9 和 ICD-10 检索,对 1993 ~ 2010 年墨尔本皇家儿童医院中 <18 岁并经影像学确诊有 AIS 的心脏病患儿进行回顾性分析。

**结果：**共有 76 例经影像学确认为 AIS 的心脏病患儿,确诊年龄的中位数为 5 个月(四分位距 0 ~ 58)。心脏病变包括 42 例(55%)发绀型先天性心脏病(congenital heart disease, CHD)、24 例(29%)非发绀型心脏病、6 例(8%)心肌病 / 心肌炎、3 例(4%)感染性心内膜炎、3 例(4%)原发性心律失常。52 例(68%)患者在如下心脏手术中出现卒中:41 例在心脏手术后出现(4.6 个卒中 /1000 个手术)、11 例在心导管术后出现(1.7 个卒中 /1000 个导管术)。从手术开始至卒中诊断的中位时间为 3 天(四分位距 2 ~ 7),据估计 68%(95% 可信区间 58% ~ 79%)的卒中发生在围手术期。围手术期卒中的发生率按诊断类别各不相同,但最常见于行姑息性手术的发绀型 CHD 患者(22 / 2,256, 1%)( $p < 0.005$ )。有 3 例 AIS 相关的死亡病例及 54 例存活者遗留神经功能缺损。

**结论：**发绀型 CHD 婴儿的围手术期最易发生 AIS。仍需要进一步行前瞻性队列研究确定有效的一级和二级预防策略。

*Neurology*® 2015;85:2053–2059
